# Supplementary material for: Vegetative Hyphal Fusion and Subsequent Nuclear Behavior in Epichloë Grass Endophytes
Source: PubMed Central journal article supplement (PMC4383479; doi:10.1371/journal.pone.0121875), 2015-04-02
Supplement: pone.0121875.s002.pdf [file pone.0121875.s002.pdf]

**Extensive hyphal cords**  
(*E. amarillans* E57)

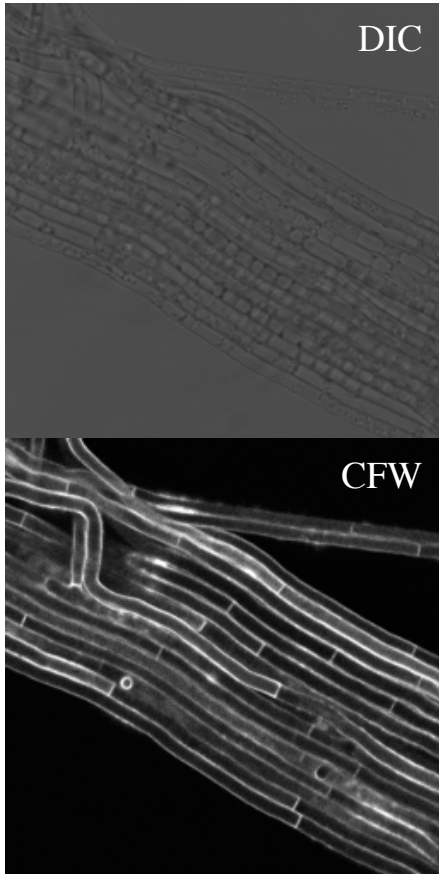

**Minor hyphal cords**  
(*Epichloë* sp PauTG-1 e55)

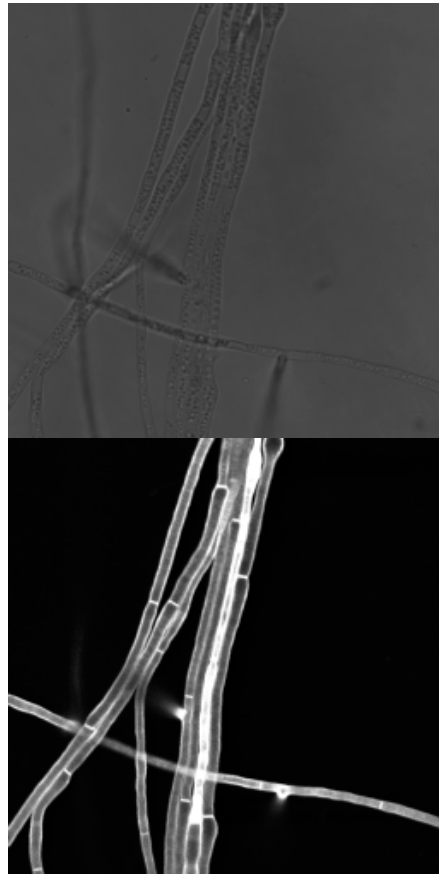

**No hyphal cords**  
(*E. festucae* E1035.33)

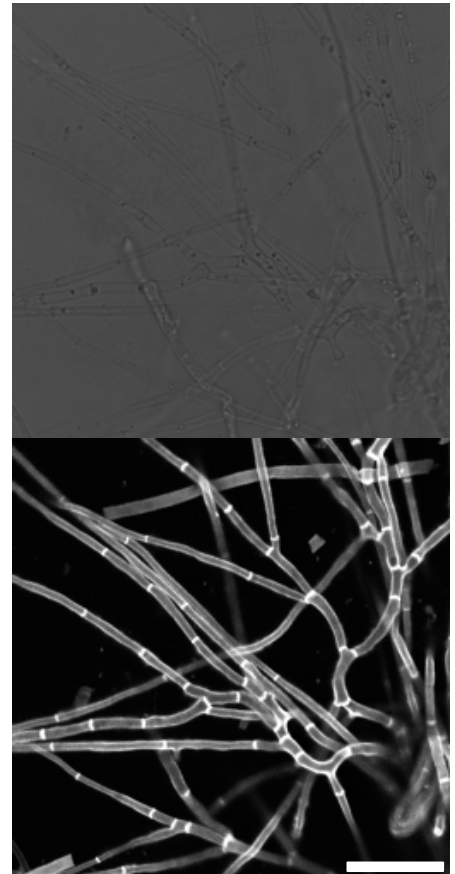

**S2 Fig. Hyphal cord-like structures in *Epichloë* grown in culture.** DIC optics and Calcofluor White (CFW) staining showing examples of hyphal cord-like structures of *Epichloë* endophytes. Bars represent 20  $\mu$ m.
