# Supplementary material for: Vegetative Hyphal Fusion and Subsequent Nuclear Behavior in Epichloë Grass Endophytes
Source: PubMed Central journal article supplement (PMC4383479; doi:10.1371/journal.pone.0121875), 2015-04-02
Supplement: pone.0121875.s003.pdf [file pone.0121875.s003.pdf]

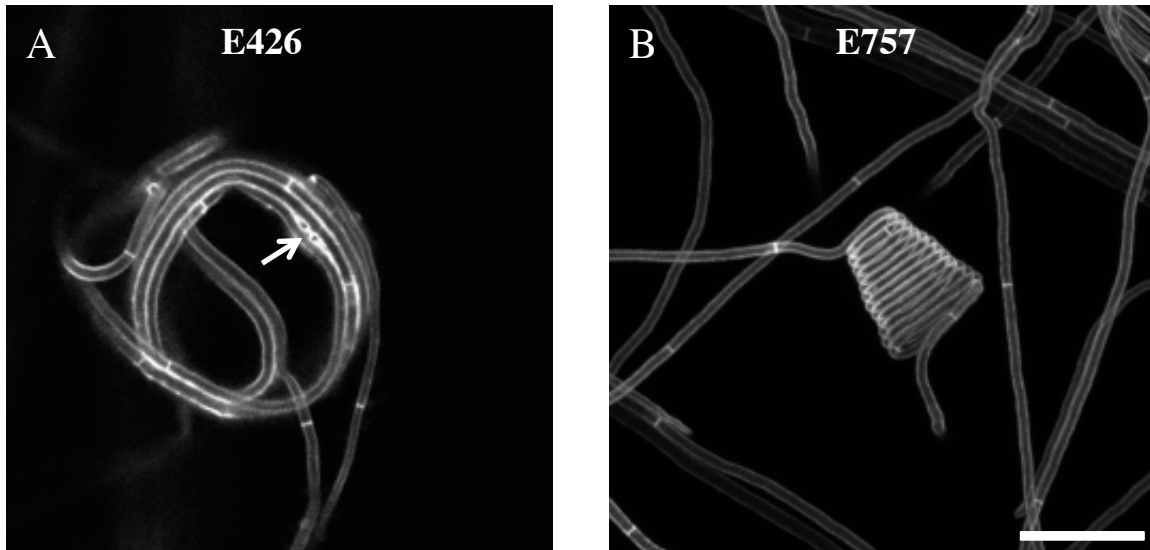

**S3 Fig. Calcofluor White staining showing hyphal coil structures.** CFW staining showing examples of hyphal coil-like structures. Hyphal fusion (white arrow) is seen in the hyphal coil of *E. typhina* subsp. *clarkii* E426, whereas the hyphal coil of *E. elymi* E757 is devoid of hyphal fusion, with spiral hyphae aligned in an orderly manner. The left image is from a single focal plane, while the right is a maximum projection image from a z-series. Bar represents 20  $\mu\text{m}$ .
